# Supplementary material for: Designing AgBi3S5 as an efficient electrocatalyst for hydrogen evolution reaction
Source: Royal Society of Chemistry journal article supplement (doi:10.1039/d4se00428k), 2024-01-01
Supplement: d4se00428k1.pdf [file d4se00428k1.pdf]

## SUPPORTING INFORMATION

### **Designing AgBi<sub>3</sub>S<sub>5</sub> as an Efficient Electrocatalyst for Hydrogen Evolution Reaction**

*Anupam Chowdhury,<sup>#</sup> Aditi De,<sup>†‡</sup> Subrata Kundu,<sup>†‡,\*</sup> and Swapan Kumar Bhattacharya<sup>#\*</sup>*

<sup>#</sup> *Physical Chemistry Section, Department of Chemistry, Jadavpur University, Kolkata-700032, West Bengal, India.*

<sup>†</sup> *Academy of Scientific and Innovative Research (AcSIR), Ghaziabad-201002, India.*

<sup>‡</sup> *Electrochemical Process Engineering (EPE) Division, CSIR-Central Electrochemical Research Institute (CECRI), Karaikudi-630003, Tamil Nadu, India.*

\*To whom correspondence should be addressed, *E-mail:* [skundu@cecri.res.in](mailto:skundu@cecri.res.in); [skbhatt7@yahoo.co.in](mailto:skbhatt7@yahoo.co.in). Phone: (+ 91) 9831699643. Fax: (+91) 3324146584

This file contains 11 pages in which instruments used in the study, electrochemical measurements, and characterizations like XPS, size distribution, FE-SEM, SEM, HR-TEM images, EDS spectrum, Faradic Efficiency measurement, XRD and FE-SEM images before and after HER are given respectively.

**No. of Figures: 9**

## INDEX

| <b>Sr. No.</b> | <b>Name of the supporting information contents</b>                                                                                                                                  | <b>Page No.</b> |
|----------------|-------------------------------------------------------------------------------------------------------------------------------------------------------------------------------------|-----------------|
| <b>S1</b>      | XPS survey spectrum of ABS electrocatalyst represented in figure 1(a), (b) and (c) XPS spectrum of Bi and S together after deconvolution of ABS electrocatalyst                     | <b>S3</b>       |
| <b>S2</b>      | Size distribution histogram of ABS electrocatalysts                                                                                                                                 | <b>S4</b>       |
| <b>S3</b>      | FESEM images of ABS electrocatalysts                                                                                                                                                | <b>S5</b>       |
| <b>S4</b>      | SEM images of AS, BS, CBS electrocatalysts                                                                                                                                          | <b>S6</b>       |
| <b>S5</b>      | HRTEM images and SAED pattern of AS, BS, and CBS electrocatalysts respectively                                                                                                      | <b>S7</b>       |
| <b>S6</b>      | EDS spectrum of ABS, AS, BS, and CBS electrocatalysts respectively                                                                                                                  | <b>S8</b>       |
| <b>S7</b>      | Faradaic efficiency (FE) of the ABS electrocatalyst for acidic HER solution                                                                                                         | <b>S9</b>       |
| <b>S8</b>      | X-Ray powder diffraction (XRD) study of the ABS electrocatalyst before and after HER in 0.5 M H <sub>2</sub> SO <sub>4</sub> solution, with (a) and without(b) base line correction | <b>S10</b>      |
| <b>S9</b>      | FESEM analysis of the ABS electrocatalyst before and after HER in 0.5 M H <sub>2</sub> SO <sub>4</sub> solution                                                                     | <b>S11</b>      |

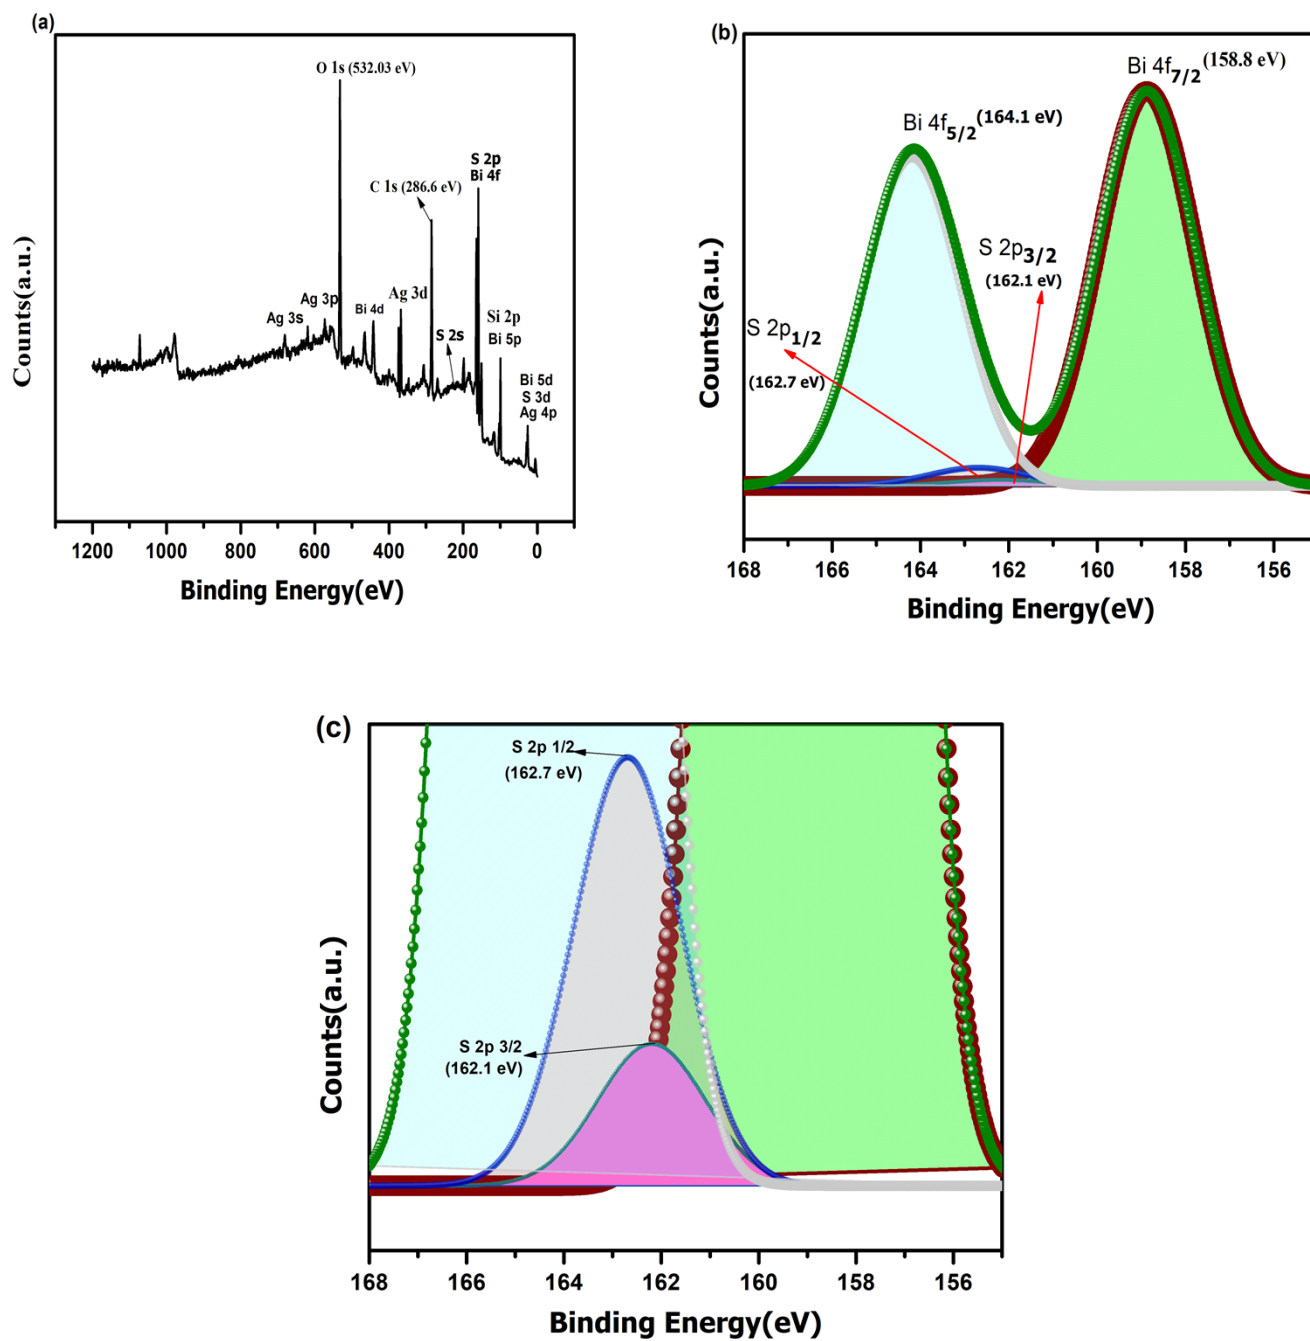

**Figure S1:** (a) The survey XPS spectrum of ABS and (b) XPS spectrum of Bi and S together of ABS after deconvolution and (c) extend of figure (b) with lower counts of Y axis scale.

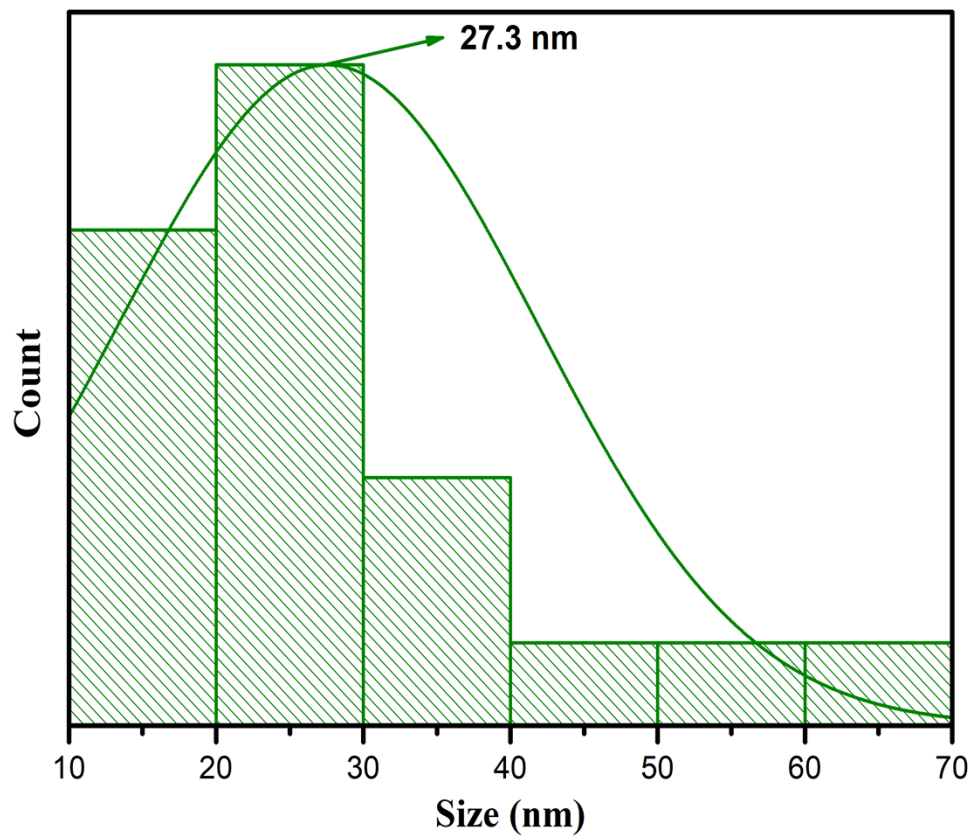

*Figure S2: Size distribution histogram for ABS.*

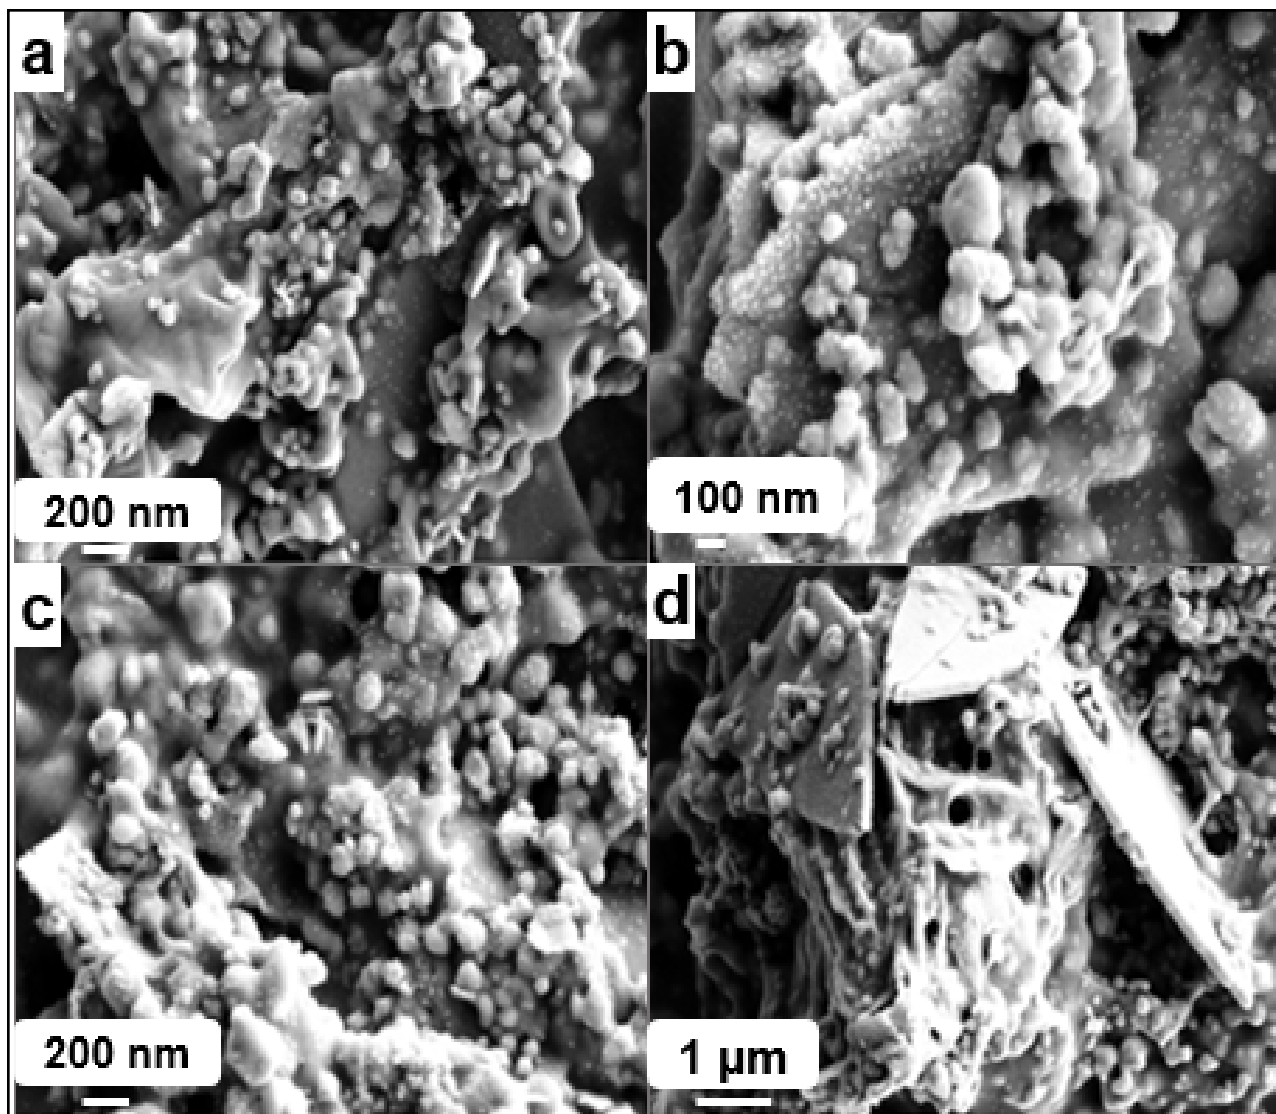

*Figure S3: (a-d) are the low to high magnified FESEM images of ABS.*

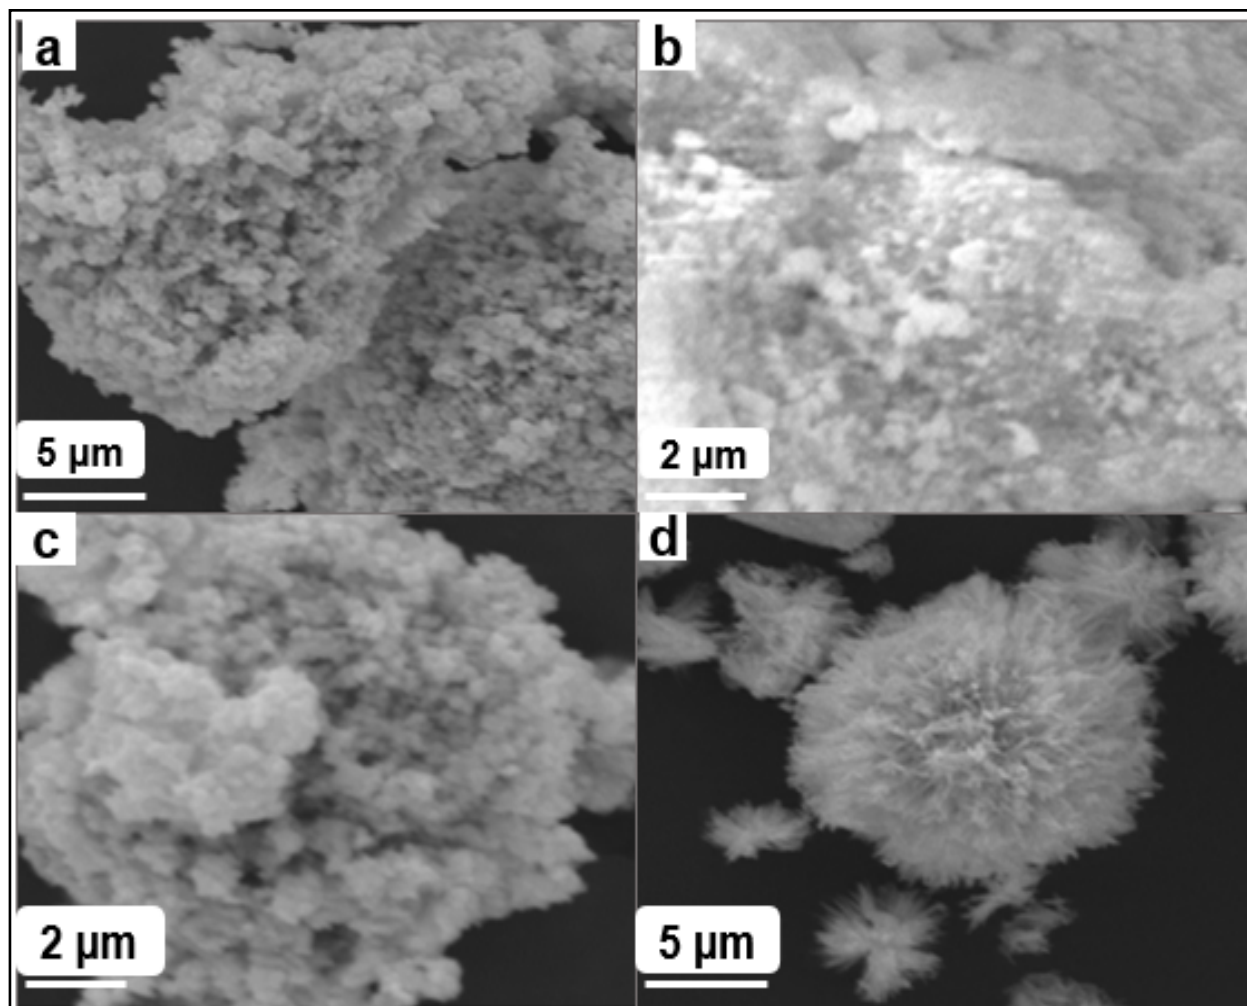

*Figure S4: Low to high (a, c) magnified SEM images of AS electrocatalyst, (b) represents the SEM image of BS and (d) represents the SEM image of CBS electrocatalyst respectively.*

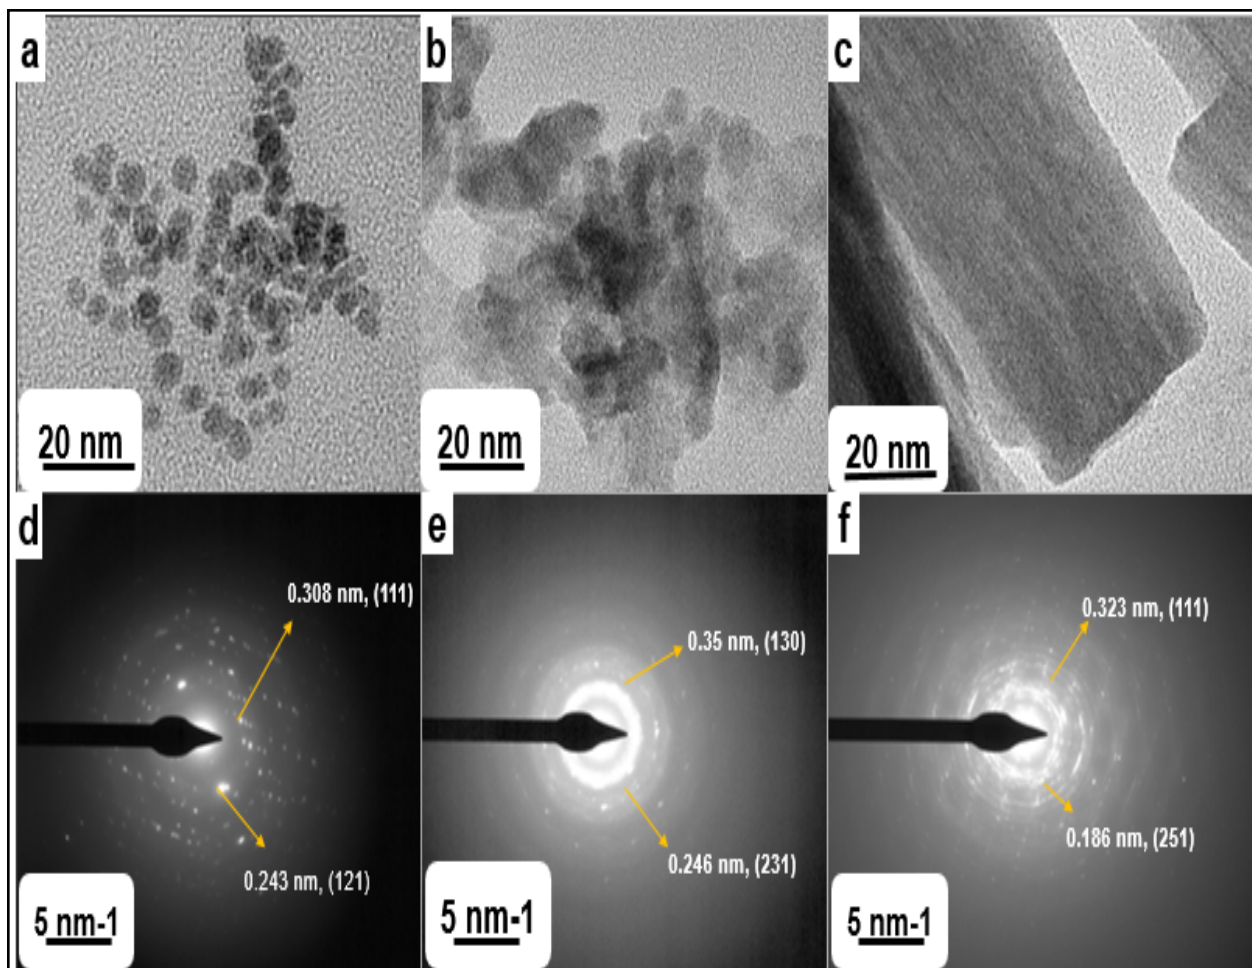

**Figure S5:** (a, b, c) HRTEM image of AS, BS and CBS electrocatalysts respectively; (d, e, f) represents SAED pattern of AS, BS, CBS electrocatalysts respectively.

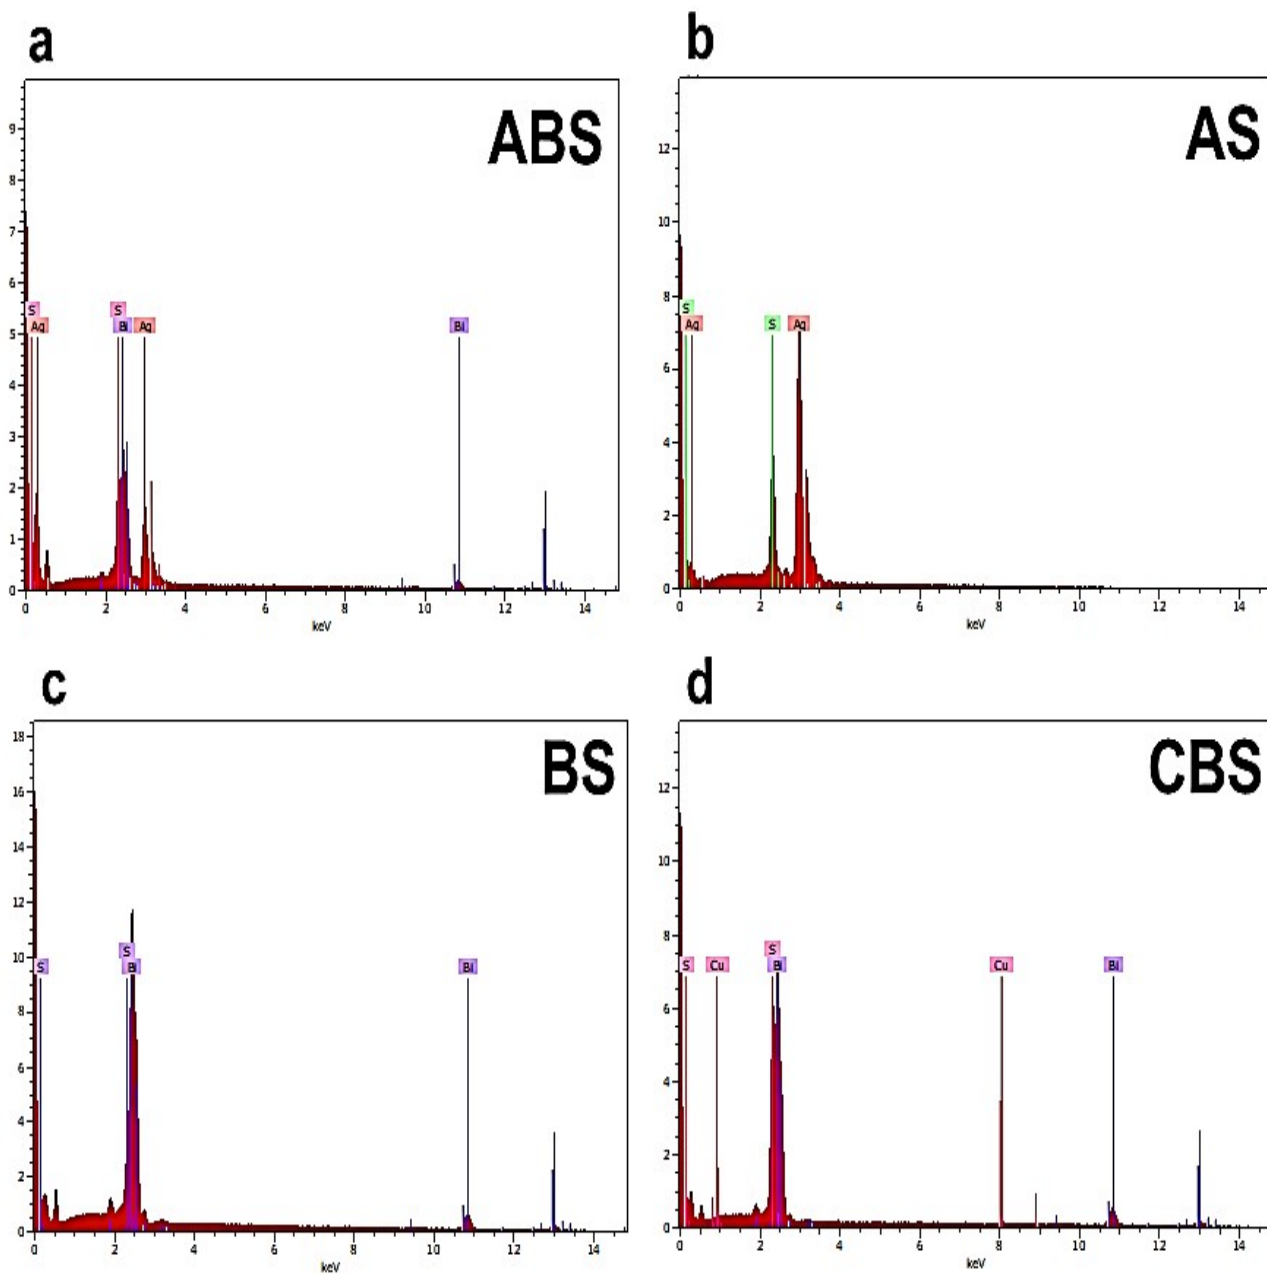

*Figure S6: (a, b, c, d) represents the EDS spectrum of ABS, AS, BS, and CBS electrocatalysts respectively.*



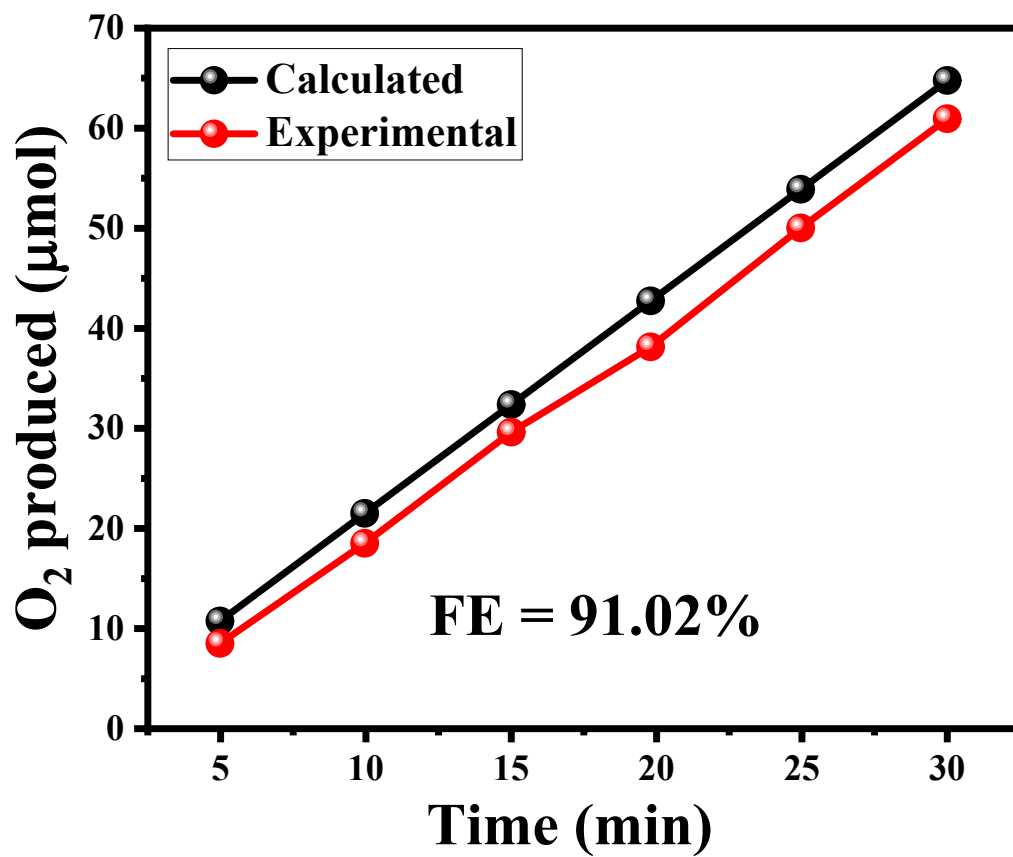

*Figure S7: Faradaic efficiency (FE) of the ABS electrocatalyst for acidic HER solution.*

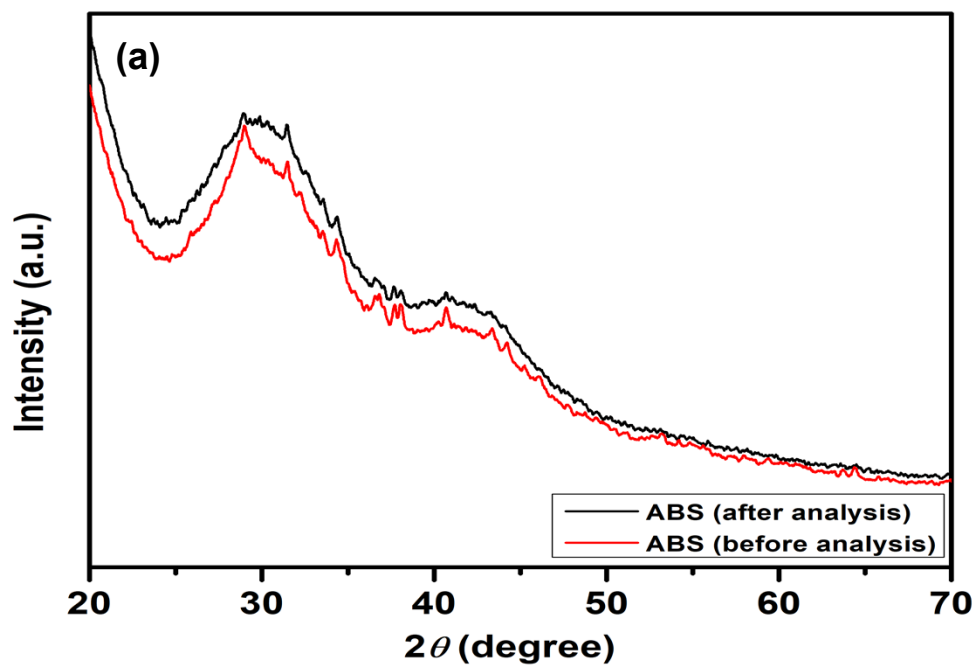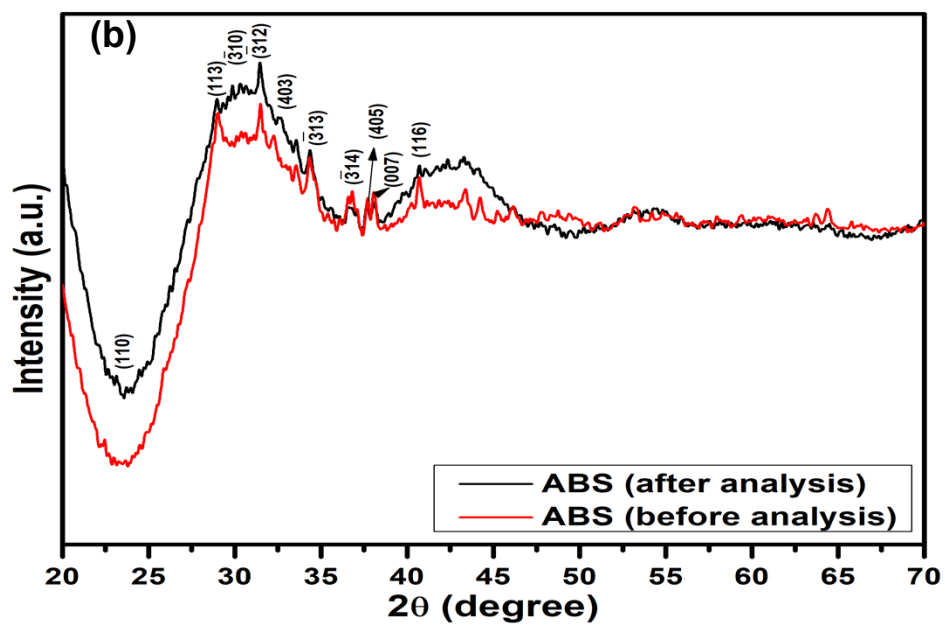

**Figure S8:** X-ray powder diffraction (XRD) study of the ABS electrocatalyst before and after HER in 0.5 M  $H_2SO_4$  solution (a) depicted without baseline correction and (b) with baseline correction respectively.

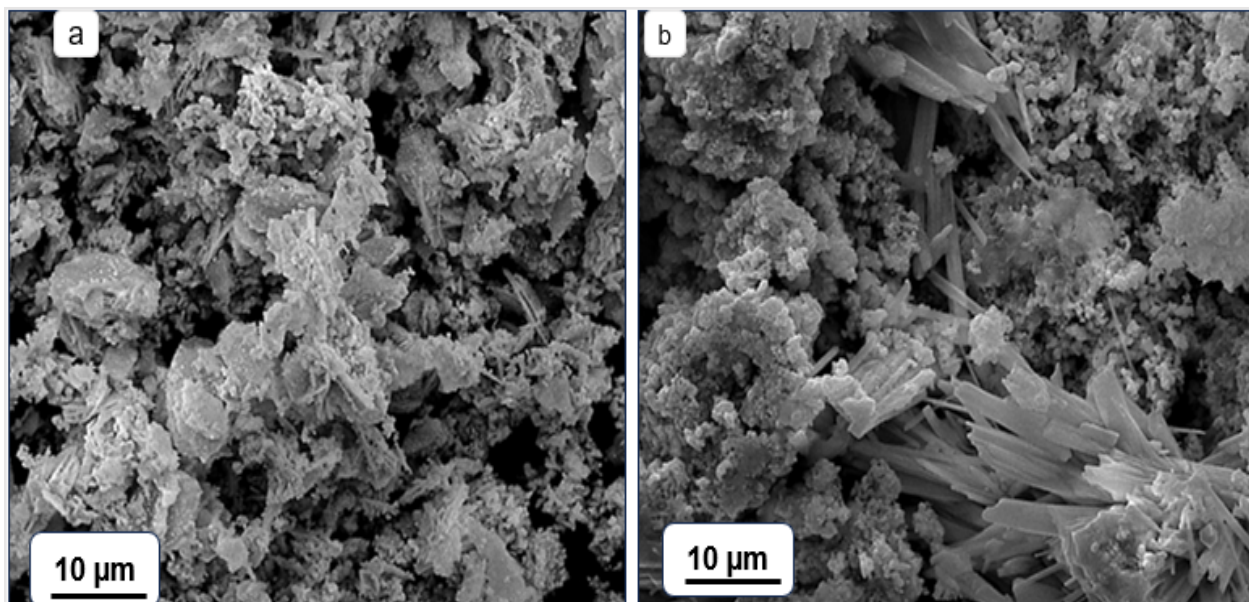

**Figure S9:** (a-b) represent the FESEM profiles of  $\text{AgBi}_3\text{S}_5$  nano-catalyst before and after HER studies respectively.
